# Supplementary material for: Inhibitor screening using microarray identifies the high capacity of neutralizing antibodies to Spike variants in SARS-CoV-2 infection and vaccination
Source: PubMed Central journal article supplement (PMC8965487; doi:10.7150/thno.67038), 2022-02-28
Supplement: thnov12p2519s1.pdf [file thnov12p2519s1.pdf]

1 - Supplementary Information-

2 **Inhibitor screening using microarray identifies the high**  
3 **capacity of neutralizing antibodies to Spike variants in**  
4 **SARS-CoV-2 infection and vaccination**

5 Xiaomei Zhang<sup>1,8</sup>, Mei Zheng<sup>2,3,5,8</sup>, Hongye Wang<sup>1,8</sup>, Haijian Zhou<sup>4,5,8</sup>, Te  
6 Liang<sup>1,8</sup>, Jiahui Zhang<sup>1</sup>, Jing Ren<sup>1</sup>, Huoying Peng<sup>1</sup>, Siping Li<sup>1</sup>, Haodong Bian<sup>1</sup>,  
7 Chundi Wei<sup>1</sup>, Shangqi Yin<sup>2,3,5</sup>, Chaonan He<sup>2,3,5</sup>, Ying Han<sup>2,3,5</sup>, Minghui Li<sup>4,5</sup>,  
8 Xuexin Hou<sup>4,5</sup>, Jie Zhang<sup>6</sup>, Liangzhi Xie<sup>6</sup>, Jing Lv<sup>7</sup>, Biao Kan<sup>4,5,9</sup>, Yajie  
9 Wang<sup>2,3,5,9</sup>, Xiaobo Yu<sup>1,9</sup>

10  
11  
12 **Affiliations**

13 <sup>1</sup> State Key Laboratory of Proteomics, Beijing Proteome Research Center,  
14 National Center for Protein Sciences-Beijing (PHOENIX Center), Beijing  
15 Institute of Lifeomics, Beijing, 102206, China.

16 <sup>2</sup> Department of Clinical Laboratory, Beijing Ditan Hospital, Capital Medical  
17 University, Beijing, 100102, China.

18 <sup>3</sup> Department of Research Ward, Beijing Ditan Hospital, Capital Medical  
19 University, Beijing, 100102, China.

20 <sup>4</sup> State Key Laboratory of Infectious Disease Prevention and Control, National  
21 Institute for Communicable Disease Control and Prevention, Chinese Center  
22 for Disease Control and Prevention, Beijing, 102206, China

23 <sup>5</sup> Joint Laboratory for Pathogen Identification of ICDC and Ditan Hospital,

24 Beijing Ditan Hospital, Capital Medical University, Beijing, 100102, China

25 <sup>6</sup> Beijing Key Laboratory of Monoclonal Antibody Research and Development,

26 Sino Biological, Inc., Beijing, 100176, China

27 <sup>7</sup> Gobond Testing Technology (Beijing) Co., Ltd., Beijing, 102629, China.

28

29 <sup>8</sup>These authors contributed equally to this work.

30 <sup>9</sup>Correspondence: xiaobo.yu@hotmail.com (X. Y.), wangyajie@ccmu.edu.cn

31 (Y. W.), kanbiao@icdc.cn (B. K.)

32

33

34 **15 Pages**

35 **5 Supplementary Tables**

36 **10 Supplementary Figures**

37

38

39

40

41

42

43

44

45 **Supplementary tables**

---

Table S1 The worldwide cumulative prevalence of SARS-CoV-2 spike protein mutations in GISAID as of December 28, 2021

---

Table S2 Clinical information of convalescent COVID-19 patients

---

Table S3 Clinical information of patients in the study 4 weeks after receiving the second dose of COVID-19 inactivated vaccine

---

Table S4 Clinical information of patients in the study 24 weeks after receiving the second dose of COVID-19 inactivated vaccine

---

Table S5 Clinical information of validation cohort 4 weeks after receiving the second dose of COVID-19 inactivated vaccine

---

46

47 **Supplementary figures**

---

Figure S1 SDS-PAGE analysis of purified recombinant SARS-CoV-2 S variants.

---

Figure S2 Timeline of when the top 20 RBD mutations emerged.

---

Figure S3 Layout of SARS-CoV-2 spike variant protein microarray.

---

Figure S4 Reproducibility of protein microarray preparation.

---

Figure S5 Correlation of the mSAIS assay and live SARS-CoV-2 neutralization assay.

---

Figure S6 Detection of different NAbs binding to immobilized RBD protein using the mSAIS assay.

---

Figure S7 Structural analysis of spike mutations located at the

---

RBD-ACE2 interaction interface that are resistant to antibody #21.

Figure S8 NAb titers to the wild type and variant S proteins in convalescent COVID-19 patients.

Figure S9 NAb titers to the wild type and variant S proteins in vaccinees.

Figure S10 Heat map of NAbs titers to S variants in vaccinees' sera after the second dose.

48

## 49 **Supplementary tables**

50 **Table S1: The worldwide cumulative prevalence of SARS-CoV-2 spike**  
 51 **protein mutations in GISAID as of December 28, 2021**

| Mutations                 | Mutation found |                        | when found** |           |
|---------------------------|----------------|------------------------|--------------|-----------|
|                           | total          | cumulative prevalence* | first        | last      |
| S1 (D614G)                | 6,239,957      | 99%                    | 26-Jan-20    | 23-Dec-21 |
| RBD (L452R)               | 3,749,640      | 59%                    | 26-Jan-20    | 23-Dec-21 |
| RBD (N501Y)               | 1,345,483      | 21%                    | 7-Feb-20     | 23-Dec-21 |
| S1 (A222V, D614G)         | 561,725        | 9%                     | 2-Feb-20     | 23-Dec-21 |
| S1 (L18F, D614G)          | 229,364        | 4%                     | 28-Jan-20    | 20-Dec-21 |
| RBD (S477N)               | 124,442        | 2%                     | 1-Mar-20     | 17-Dec-21 |
| S1 (T20N, D614G)          | 115,372        | 2%                     | 28-Jan-20    | 23-Dec-21 |
| RBD (K417N)               | 58,007         | 1%                     | 16-Mar-20    | 14-Dec-21 |
| RBD (N439K)               | 37,149         | 1%                     | 15-Feb-20    | 23-Dec-21 |
| RBD (K417N, E484K, N501Y) | 33,998         | 1%                     | 27-Mar-20    | 15-Dec-21 |
| RBD (N440K)               | 20,878         | < 0.5%                 | 28-Jan-20    | 13-Dec-21 |
| RBD (E484Q)               | 17,709         | < 0.5%                 | 27-Jan-20    | 14-Dec-21 |
| RBD (S494P)               | 13,439         | < 0.5%                 | 3-Mar-20     | 7-Dec-21  |
| RBD (G446S)               | 13,261         | < 0.5%                 | 5-Mar-20     | 14-Dec-21 |
| RBD (G446V)               | 10,960         | < 0.5%                 | 19-Mar-20    | 19-Dec-21 |
| RBD (A520S)               | 9,366          | < 0.5%                 | 18-Mar-20    | 18-Dec-21 |
| RBD (S477I)               | 8,331          | < 0.5%                 | 10-Mar-20    | 20-Dec-21 |
| RBD (A522V)               | 6,810          | < 0.5%                 | 26-Mar-20    | 12-Nov-21 |
| RBD (P384L)               | 3,783          | < 0.5%                 | 25-Feb-20    | 16-Dec-21 |

|             |       |        |           |           |
|-------------|-------|--------|-----------|-----------|
| RBD (V367F) | 3,146 | < 0.5% | 13-Mar-20 | 18-Dec-21 |
| RBD (A348S) | 2,581 | < 0.5% | 21-Nov-21 | 21-Nov-21 |
| RBD (L455F) | 2,398 | < 0.5% | 15-Mar-20 | 20-Dec-21 |
| RBD (Q414R) | 2,026 | < 0.5% | 15-Mar-20 | 23-Dec-21 |
| RBD (R408I) | 1,984 | < 0.5% | 13-Mar-20 | 18-Dec-21 |
| RBD (A475V) | 1,967 | < 0.5% | 31-Mar-20 | 10-Dec-21 |
| RBD (F490L) | 1,701 | < 0.5% | 7-Apr-20  | 15-Dec-21 |
| RBD (S477R) | 1,567 | < 0.5% | 18-Mar-20 | 2-Dec-21  |
| RBD (A352S) | 1,518 | < 0.5% | 28-Mar-20 | 18-Dec-21 |
| RBD (Y453F) | 1,405 | < 0.5% | 1-Feb-20  | 14-Dec-21 |
| RBD (Y508H) | 1,195 | < 0.5% | 28-Jan-20 | 9-Dec-21  |
| RBD (F338L) | 1,126 | < 0.5% | 31-Mar-20 | 21-Nov-21 |
| RBD (E471Q) | 1,082 | < 0.5% | 6-Apr-20  | 6-Dec-21  |
| RBD (T478I) | 917   | < 0.5% | 3-Mar-20  | 18-Dec-21 |
| RBD (N370S) | 758   | < 0.5% | 30-Mar-20 | 8-Dec-21  |
| RBD (P499R) | 742   | < 0.5% | 18-Mar-20 | 14-Dec-21 |
| RBD (V503F) | 640   | < 0.5% | 28-Mar-20 | 20-Dec-21 |
| RBD (A435S) | 540   | < 0.5% | 2-Apr-20  | 15-Dec-21 |
| RBD (S359N) | 528   | < 0.5% | 25-Mar-20 | 18-Dec-21 |
| RBD (F456L) | 516   | < 0.5% | 8-Apr-20  | 3-Dec-21  |
| RBD (V483I) | 485   | < 0.5% | 29-Mar-20 | 29-Mar-20 |
| RBD (V483A) | 456   | < 0.5% | 15-Mar-20 | 14-Aug-21 |
| RBD (N354D) | 445   | < 0.5% | 29-Feb-20 | 17-Dec-21 |
| RBD (E406Q) | 372   | < 0.5% | 1-Mar-20  | 14-Dec-21 |
| RBD (P521S) | 338   | < 0.5% | 17-Mar-20 | 20-Dec-21 |
| RBD (K378N) | 310   | < 0.5% | 10-Apr-20 | 15-Dec-21 |
| RBD (A520V) | 304   | < 0.5% | 10-Mar-20 | 23-Dec-21 |
| RBD (V445F) | 266   | < 0.5% | 15-Apr-20 | 16-Dec-21 |
| RBD (P337S) | 242   | < 0.5% | 13-Mar-20 | 16-Dec-21 |
| RBD (V341I) | 229   | < 0.5% | 14-Jan-21 | 14-Dec-21 |
| RBD (K458R) | 181   | < 0.5% | 1-Apr-20  | 13-Dec-21 |
| RBD (G485S) | 176   | < 0.5% | 6-Apr-20  | 15-Dec-21 |
| RBD (K378R) | 88    | < 0.5% | 30-Mar-20 | 15-Dec-21 |
| RBD (F377L) | 87    | < 0.5% | 8-Oct-20  | 14-Dec-21 |
| RBD (F342L) | 74    | < 0.5% | 6-May-20  | 18-Dec-21 |
| RBD (N481D) | 67    | < 0.5% | 19-Feb-20 | 15-Dec-21 |
| RBD (A372T) | 61    | < 0.5% | 15-Dec-20 | 9-Dec-21  |
| RBD (F486S) | 46    | < 0.5% | 4-Apr-20  | 23-Dec-21 |
| RBD (A372S) | 44    | < 0.5% | 8-Jul-20  | 16-Dec-21 |
| RBD (V395I) | 26    | < 0.5% | 1-Apr-20  | 15-Dec-21 |
| RBD (T385A) | 22    | < 0.5% | 8-Jun-20  | 7-Dec-21  |
| RBD (W436R) | 7     | < 0.5% | 3-Mar-20  | 18-Dec-21 |
| RBD (Q414E) | 1     | < 0.5% | 18-Mar-20 | 19-Dec-21 |
| RBD (T393P) | 1     | < 0.5% | 29-Jul-20 | 15-Dec-21 |

|                                    |   |              |
|------------------------------------|---|--------------|
| S1 (N234Q)                         | 0 | not detected |
| S1 (HV69-70 deltion, N501Y, D614G) | 0 | not detected |
| RBD (Y505C)                        | 0 | not detected |
| RBD (F456E)                        | 0 | not detected |
| RBD (N487R)                        | 0 | not detected |

52 Note: The prevalences were calculated by Outbreak.info Mutation Situation Reports  
53 (<https://outbreak.info/situation-reports#voi>) with 6,315,868 sequences from GISAID as of  
54 28 December 2021.

55 \* Apparent cumulative prevalence is the ratio of the sequences containing mutation to all  
56 sequences collected since the identification of mutation in that location.

57 \*\* Dates are based on the sample collection date.

58

59 **Table S2: Clinical information of the convalescent COVID-19 patients**

| Gender | n  | Age, median  | Weeks post discharge |
|--------|----|--------------|----------------------|
| Female | 11 | 49 (18 ~ 64) | 2 or 4               |
| Male   | 14 | 36 (5 ~ 68)  | 2 or 4               |
| Total  | 25 | 43 (5 ~ 68)  | 2 or 4               |

60

61 **Table S3: Clinical information of people in the study 4 weeks after**  
62 **receiving the second dose of COVID-19 inactivated vaccine**

| Gender | n  | Age, median  | Weeks post the<br>second vaccine dose |
|--------|----|--------------|---------------------------------------|
| Female | 6  | 36 (21 ~ 53) | 4                                     |
| Male   | 24 | 37 (23 ~ 57) | 4                                     |
| Total  | 30 | 37 (21 ~ 57) | 4                                     |

63

64

65 **Table S4: Clinical information of patients in the study 24 weeks after**  
66 **receiving the second dose of COVID-19 inactivated vaccine**

| Gender | n  | Age, median    | Weeks post the second vaccine dose |
|--------|----|----------------|------------------------------------|
| Female | 18 | 38.5 (27 ~ 55) | 24                                 |
| Male   | 7  | 36 (31 ~ 46)   | 24                                 |
| Total  | 25 | 38 (27 ~ 55)   | 24                                 |

67

68 **Table S5: Clinical information of validation cohort 4 weeks after**  
69 **receiving the second dose of COVID-19 inactivated vaccine**

| Gender | n   | Age, median  | Weeks post the second vaccine dose |
|--------|-----|--------------|------------------------------------|
| Female | 11  | 46 (21 ~ 70) | 4                                  |
| Male   | 93  | 39 (23 ~ 70) | 4                                  |
| Total  | 104 | 39 (21 ~ 70) | 4                                  |

70

71 **Supplementary Figures**

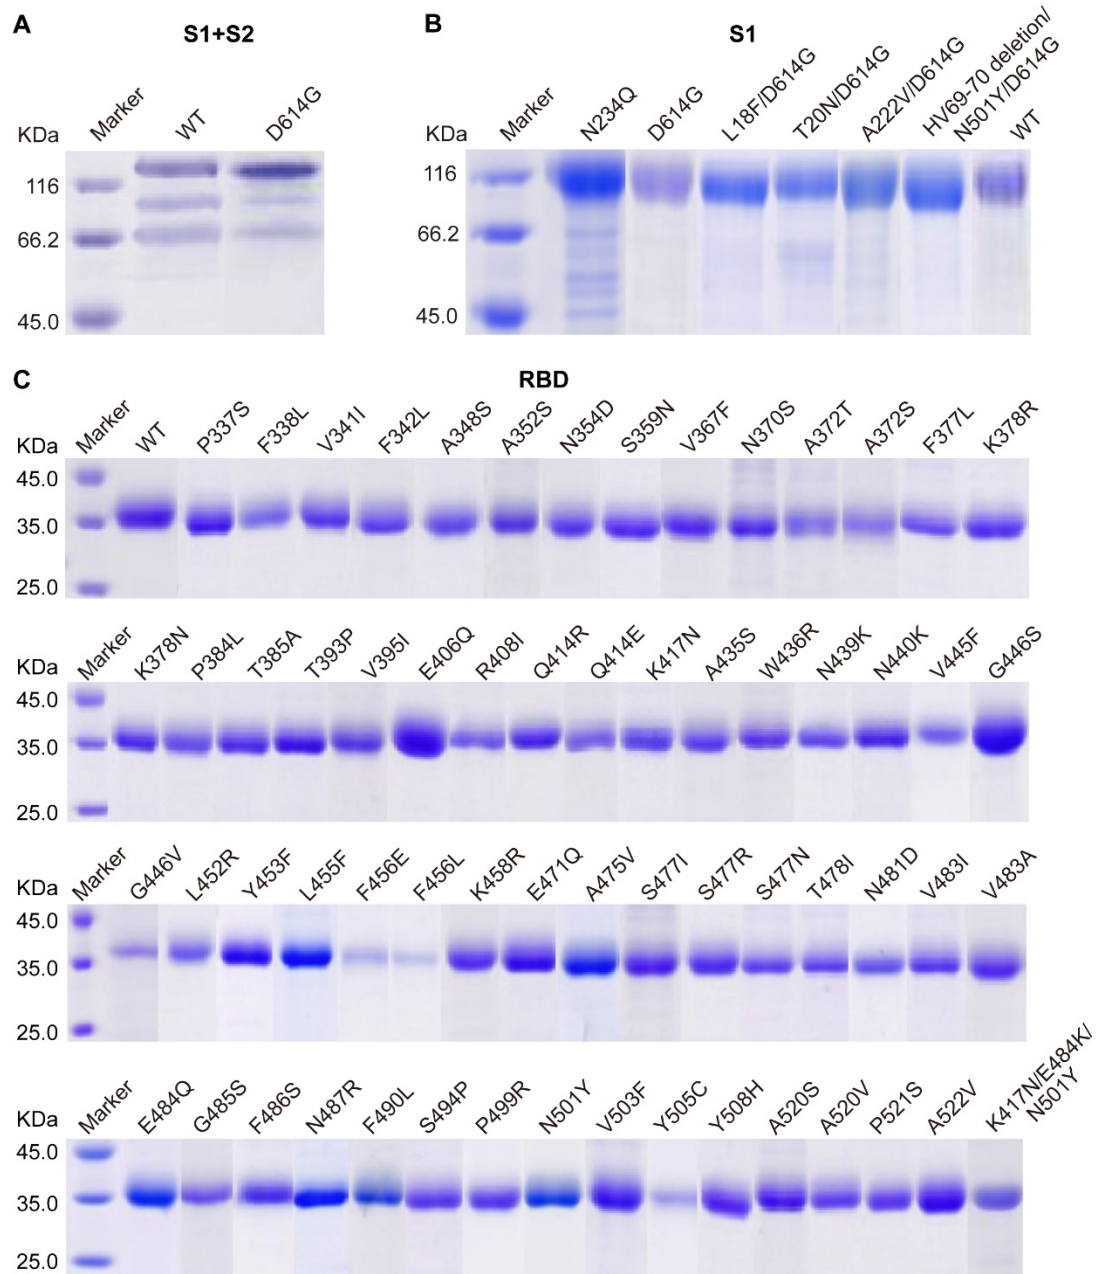

72  
73  
74  
75  
76  
77

**Figure S1. SDS-PAGE analysis of purified recombinant SARS-CoV-2 S variants.**  
 (A-C) are SDS-PAGE analyses of S1+S2, S1 and RBD wild-type and variant proteins, respectively. WT: wild-type.



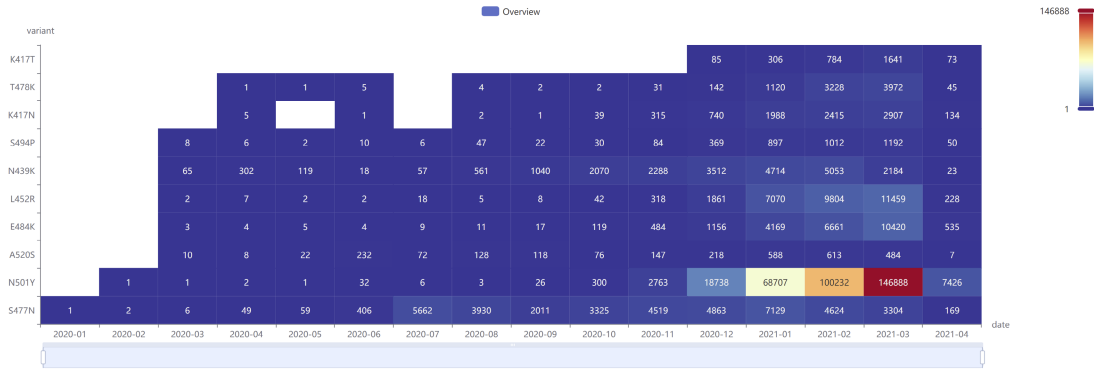

78

79 **Figure S2. Timeline of when the top 20 RBD mutations emerged.** The graph was  
 80 obtained from the COVID-19 virus mutation tracker database  
 81 (<https://www.cbrc.kaust.edu.sa/covmt/index.php?p=top-rbd-variants-heatmap>) [1].

82

83

84

85

|    | 1          | 2          | 3           | 4                      | 5            | 6            | 7          | 8          | 9               | 10             | 11             | 12                              |
|----|------------|------------|-------------|------------------------|--------------|--------------|------------|------------|-----------------|----------------|----------------|---------------------------------|
| 1  | buffer     | N          | buffer      | S1+S2                  | S1+S2(D614G) | S1           | S1(N234Q)  | S1(D614G)  | S1(A222V/D614G) | S1(T20N/D614G) | S1(L18F/D614G) | S1(HV69-70 deltion/N501Y/D614G) |
| 2  | buffer     | N          | buffer      | S1+S2                  | S1+S2(D614G) | S1           | S1(N234Q)  | S1(D614G)  | S1(A222V/D614G) | S1(T20N/D614G) | S1(L18F/D614G) | S1(HV69-70 deltion/N501Y/D614G) |
| 3  | RBD insect | RBD 293    | RBD (V367F) | RBD(R408I)             | RBD(V341I)   | RBD(Y508H)   | RBD(N439K) | RBD(V503F) | RBD(A522V)      | RBD(S494P)     | RBD(A372S)     | RBD(N354D)                      |
| 4  | RBD insect | RBD 293    | RBD (V367F) | RBD(R408I)             | RBD(V341I)   | RBD(Y508H)   | RBD(N439K) | RBD(V503F) | RBD(A522V)      | RBD(S494P)     | RBD(A372S)     | RBD(N354D)                      |
| 5  | RBD(A520S) | RBD(Q414E) | RBD(P384L)  | RBD(A348S)             | RBD(F338L)   | RBD(F377L)   | RBD(L452R) | RBD(P521S) | RBD(T478I)      | RBD(V483I)     | RBD(S359N)     | RBD(K378R)                      |
| 6  | RBD(A520S) | RBD(Q414E) | RBD(P384L)  | RBD(A348S)             | RBD(F338L)   | RBD(F377L)   | RBD(L452R) | RBD(P521S) | RBD(T478I)      | RBD(V483I)     | RBD(S359N)     | RBD(K378R)                      |
| 7  | RBD(A372T) | RBD(A520V) | RBD(A435S)  | RBD(E406Q)             | RBD(K378N)   | RBD(N370S)   | RBD(Q414R) | RBD(S477I) | RBD(S477N)      | RBD(T385A)     | RBD(T393P)     | RBD(V395I)                      |
| 8  | RBD(A372T) | RBD(A520V) | RBD(A435S)  | RBD(E406Q)             | RBD(K378N)   | RBD(N370S)   | RBD(Q414R) | RBD(S477I) | RBD(S477N)      | RBD(T385A)     | RBD(T393P)     | RBD(V395I)                      |
| 9  | RBD(V483A) | RBD(A475V) | RBD(G446V)  | RBD(G485S)             | RBD(N440K)   | RBD(E471Q)   | RBD(A352S) | RBD(K417N) | RBD(F342L)      | RBD(P337S)     | RBD(S477R)     | RBD(L456F)                      |
| 10 | RBD(V483A) | RBD(A475V) | RBD(G446V)  | RBD(G485S)             | RBD(N440K)   | RBD(E471Q)   | RBD(A352S) | RBD(K417N) | RBD(F342L)      | RBD(P337S)     | RBD(S477R)     | RBD(L456F)                      |
| 11 | RBD(K458R) | RBD(N481D) | RBD(F456L)  | RBD(Y505C)             | RBD(F456E)   | RBD(F486S)   | RBD(N487R) | RBD(G446S) | RBD(P499R)      | RBD(V445F)     | RBD(Y453F)     | RBD(E484Q)                      |
| 12 | RBD(K458R) | RBD(N481D) | RBD(F456L)  | RBD(Y505C)             | RBD(F456E)   | RBD(F486S)   | RBD(N487R) | RBD(G446S) | RBD(P499R)      | RBD(V445F)     | RBD(Y453F)     | RBD(E484Q)                      |
| 13 | RBD(N501Y) | RBD(F490L) | RBD(W436R)  | RBD(K417N/E484K/N501Y) | MERS-CoV RBD | SARS-CoV RBD | RBD-hFc    | RBD-mFc    | RBD-mFc (V367F) | RBD-rabbitFc   | RBD            | buffer                          |
| 14 | RBD(N501Y) | RBD(F490L) | RBD(W436R)  | RBD(K417N/E484K/N501Y) | MERS-CoV RBD | SARS-CoV RBD | RBD-hFc    | RBD-mFc    | RBD-mFc (V367F) | RBD-rabbitFc   | RBD            | buffer                          |

86

87 **Figure S3. Layout of SARS-CoV-2 spike variant protein microarray.** The buffer  
 88 and nucleocapsid (N) protein served as the negative controls. The RBD protein  
 89 served as the positive control.

90

91

92

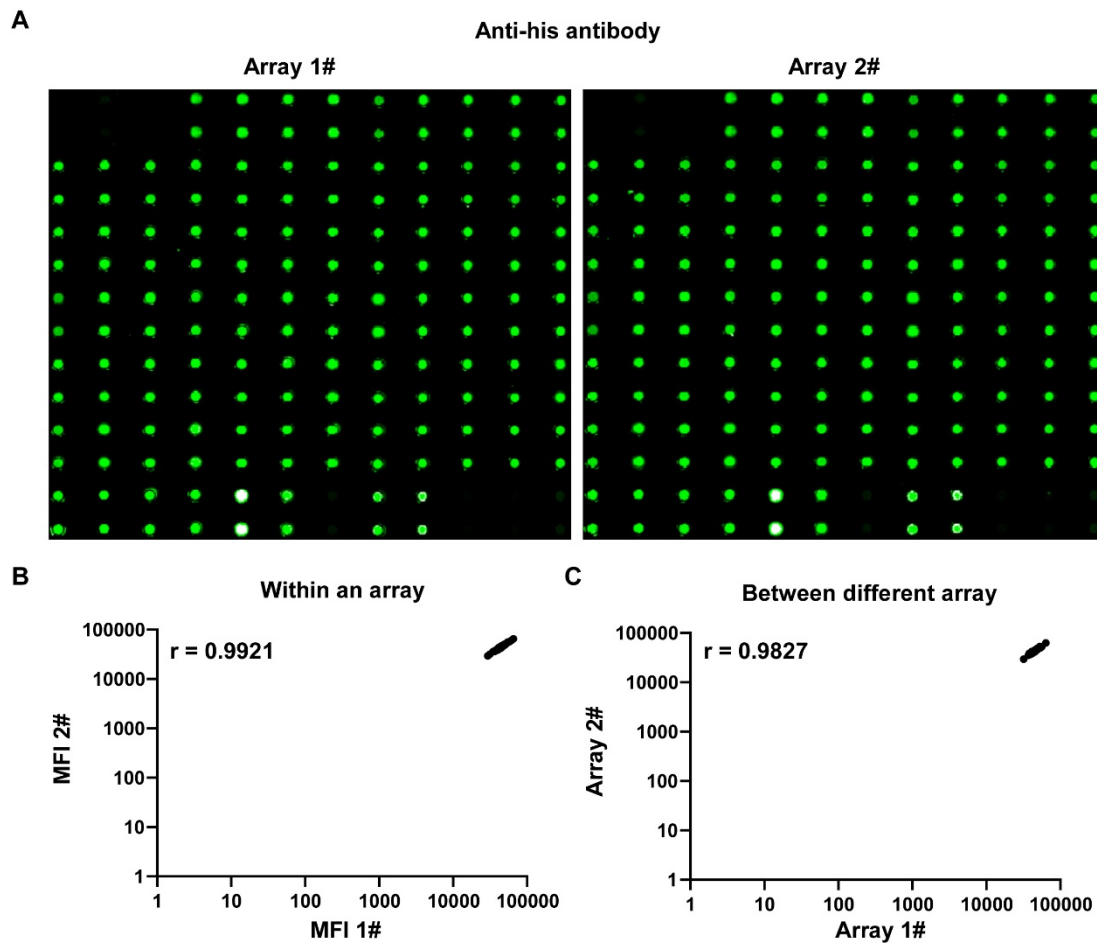

93

94 **Figure S4. Reproducibility of protein microarray preparation.** (A) Fluorescent  
 95 staining of immobilized proteins on the glass-based microarray using an anti-his  
 96 antibody; (B-C) are the intra- and inter-array reproducibility, respectively.

97

98

99

100

101

102

103

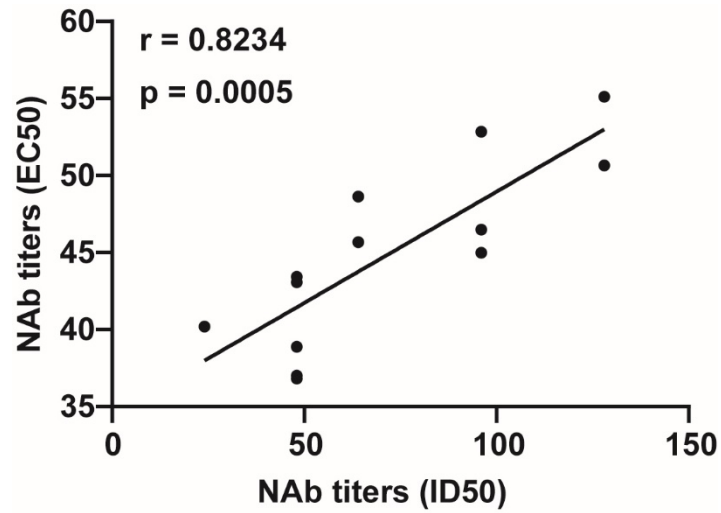

104

105 **Figure S5. Correlation of the mSAIS assay and live SARS-CoV-2 neutralization**

106 **assay.** Pearson's correlation coefficient and linear regression analyses were

107 performed by the GraphPad Prism software 8.3. Statistical significance was

108 determined using the two-tailed t-test.

109

110

111

112

113

114

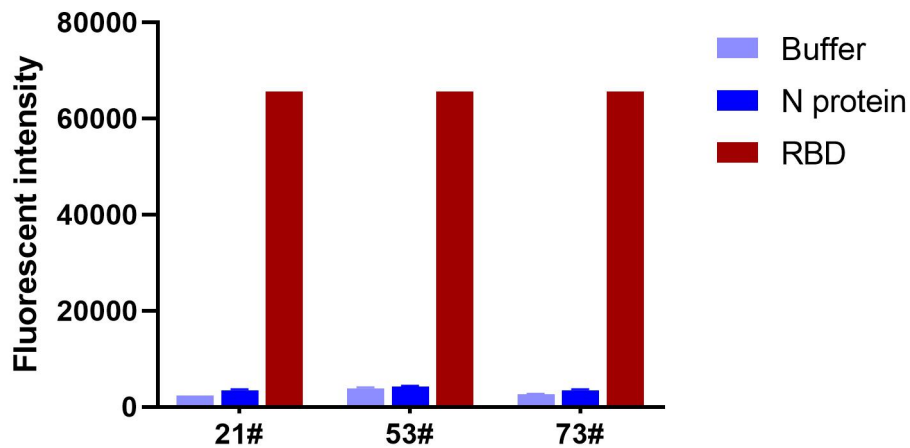

115

116 **Figure S6. Detection of different anti-RBD antibodies binding to immobilized**

117 **RBD protein using the SARS-CoV-2 proteome peptide microarray. The**

118 **nucleocapsid (N) protein and buffer served as the negative controls.**

119

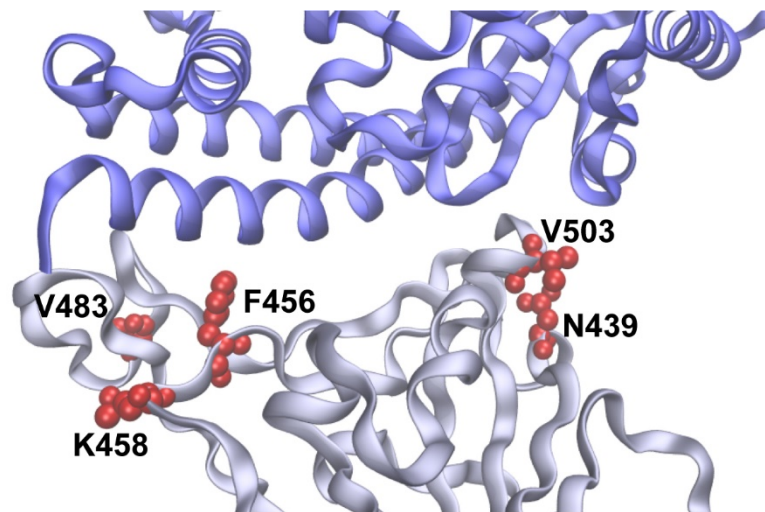

120

121 **Figure S7. Structural analysis of spike mutations located at the RBD-ACE2**

122 **interaction interface that are resistant to antibody #21. The interaction structure of**

123 **the SARS-CoV-2 RBD and human ACE2 were derived from the Protein Data Bank**

124 **with PDB ID 6M0J. The S protein is colored in gray, the ACE2 protein is colored in**

125 **blue, and RBD mutations are labeled in red.**

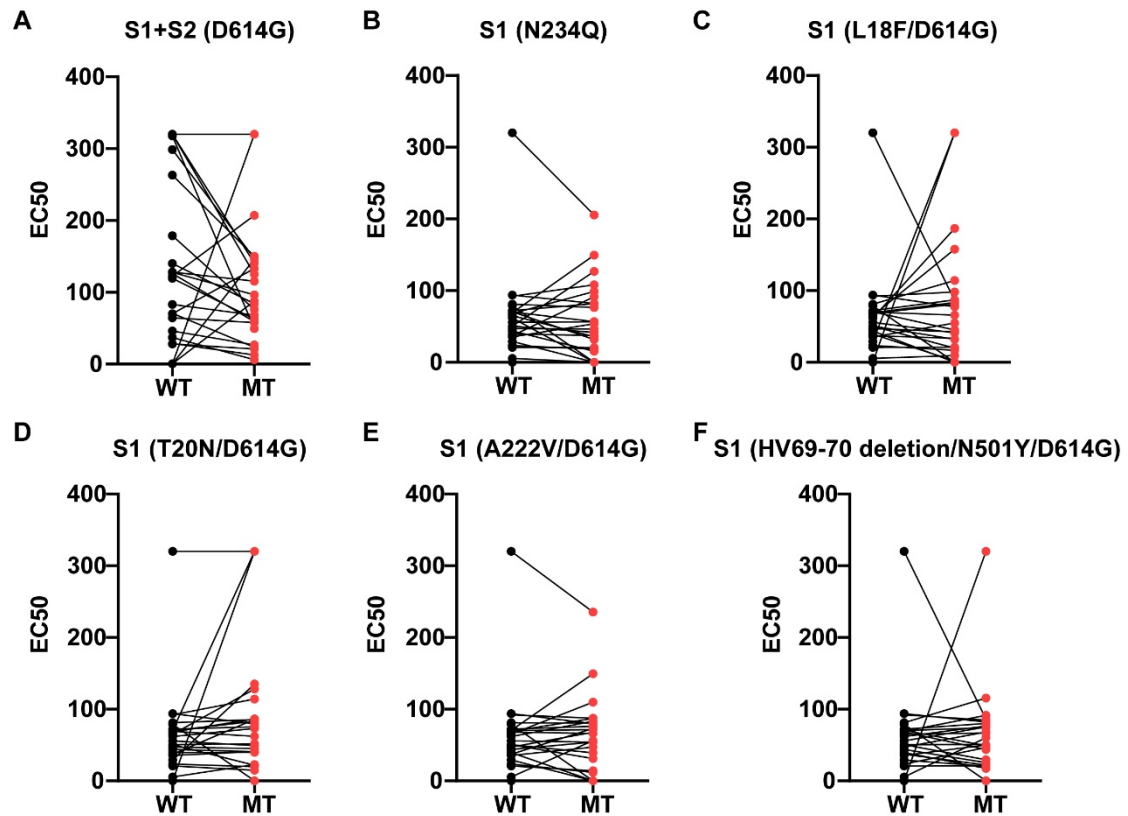

127

128 **Figure S8. NAb titers to the wild type and variant S proteins in convalescent**129 **COVID-19 patients.** (A-F) are the NAb titers of convalescent serum to different S

130 variants with D614G, N234Q, L18F/D614G, T20N/D614G, A222V/D614G and

131 hv69-70 deletion/N501Y/D614G, respectively. WT and MT represent the wild type and

132 mutants, respectively.

133

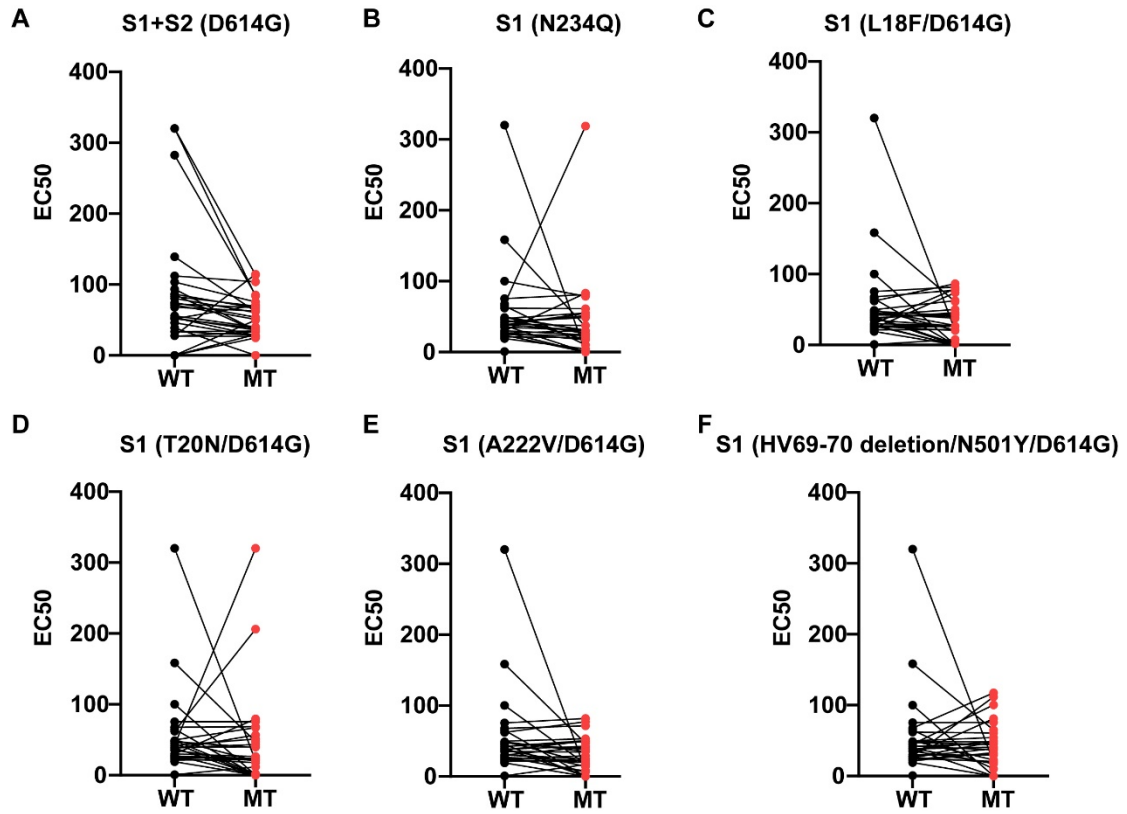

134

135 **Figure S9. NAb titers to the wild type and variant S proteins in vaccinees. (A-F)**

136 are the NAb titers of vaccinees serum to different S variants with D614G, N234Q,

137 L18F/D614G, T20N/D614G, A222V/D614G and hv69-70 deletion/N501Y/D614G,

138 respectively. WT and MT represent the wild type and mutants, respectively.

139

140

141

142

143

144

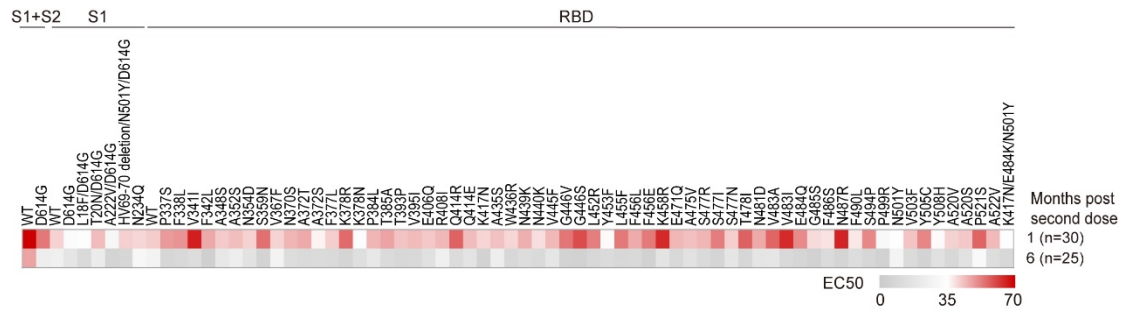

145

146 **Figure S10. Heat map of NAb titers to S variants in vaccinees' sera after the**  
 147 **second dose.** The NAb titers of 30 and 25 vaccinees one (1) and six (6) months,  
 148 respectively, after receiving the second dose of the inactivated COVID-19 vaccine  
 149 were measured using the mSAIS assay. The heat map was generated using the mean  
 150 EC50. The rainbow color from gray to red correspond to the EC50 from low to high,  
 151 respectively. WT = wild-type.

152

153 **References:**

- 154 1. Alam I, Radovanovic A, Incitti R, Kamau AA, Alarawi M, Azhar EI, et al. CovMT: an  
 155 interactive SARS-CoV-2 mutation tracker, with a focus on critical variants. *Lancet Infect Dis.*  
 156 2021; 21: 602.

157
